# Supplementary material
Source: PubMed Central journal article supplement (PMC4150066)
Supplement: supp_127.17.3830_JCS154583.pdf [file supp_127.17.3830_JCS154583.pdf]

## SUPPLEMENTARY MATERIAL

**Fig. S1. The expression of Notch targets is suppressed in endocycling follicle cells where E(y)1 function is compromised.** (A,A') Induction of an independent *e(y)I*-RNAi transgene suppressed *hnt* expression in the *e(y)I*-RNAi follicle cells of a stage-7 egg chamber, marked by the expression of RFP (red, A). (B,B') Expression of *brE-lacZ* was abolished in mid-stage follicle cells with *e(y)I* depleted [expressing GFP (red, B)].

**Fig. S2. The M/E switch is disrupted in the *e(y)I*-RNAi follicle cells.** (A,A') The nuclei of *e(y)I*-depleted follicle cells (expressing RFP) in a stage-8 egg chamber are much smaller and more crowded than those of their neighboring wild-type cells (lacking RFP). (B,B') In an egg chamber at stage 8, PH3 was detected in the *e(y)I*-knockdown follicle cells (expressing RFP), but not in wild-type cells (lacking RFP). (C,C') After stage 7, CycB, which is normally suppressed in wild-type endocycling follicle cells (lacking RFP), was randomly expressed in the *e(y)I*-RNAi follicle cell clones (expressing RFP). Cell nuclei were co-stained with DAPI (green in A' and blue in B,C).

**Fig. S3. Poor viability of *e(y)I* mutant cells in the wing disc and Lateral inhibition defects in *e(y)I*-depleted tissues.** (A-A'') Wild-type *FRT19A* mock clones in a wing disc. (B-B'') The sizes of *e(y)I* mutant clones generated in a *Minute*<sup>+/-</sup> [*M(1)*<sup>osp/+</sup>] background, marked by the absence of GFP, are extremely small, compared with those of control clones in (A-A''). Mosaic clones were induced by heat-shocking early second instar larvae at 37°C for 1 hour, and wing discs were dissected after 72 hours at 25°C. Cell nuclei were labeled with DAPI in red (A'', B''). (C) An adult scutellum bearing *FRT19A* mock clones had four well-organized bristles (white arrows). (D) A fly with *e(y)I* mutant clones carried an extra bristle in scutellum (yellow arrow, in 8 out of 50 adult flies observed). (E) Portion of an adult wing with *FRT19A* mock clones. (F) Extra vein-like structures (black arrows) observed in an adult wing carrying *e(y)I* mutant clones. (G) Portion of a *C96-Gal4* control wing. (H) Dense wing margin bristles (black arrows) in *C96-Gal4*>*e(y)I*-RNAi flies .

**Fig. S4. Notch gain-of-function phenotypes in Su(H)-VP16-expressing tissues.** (A-B') *en-Gal4*, *UAS-RFP/+*; *tub-Gal80ts/+* control discs showed normal expression patterns of Notch targets, Cut (A') and Wg (B'). (C-D') Ectopic expression of *Su(H)-VP16* by *en-Gal4* caused wing disc overgrowth and Notch signaling activation, as monitored by expression of Cut (C') and Wg (D') in the posterior compartment of wing discs. (E-H) Although the *C96-Gal4*>*Su(H)-VP16* adult wing did not show obvious overgrowth (F), when compared with the *C96-Gal4* control (E), it displayed partial loss of wing margin bristles (H, red arrows), a typical Notch gain-of-function phenotype.

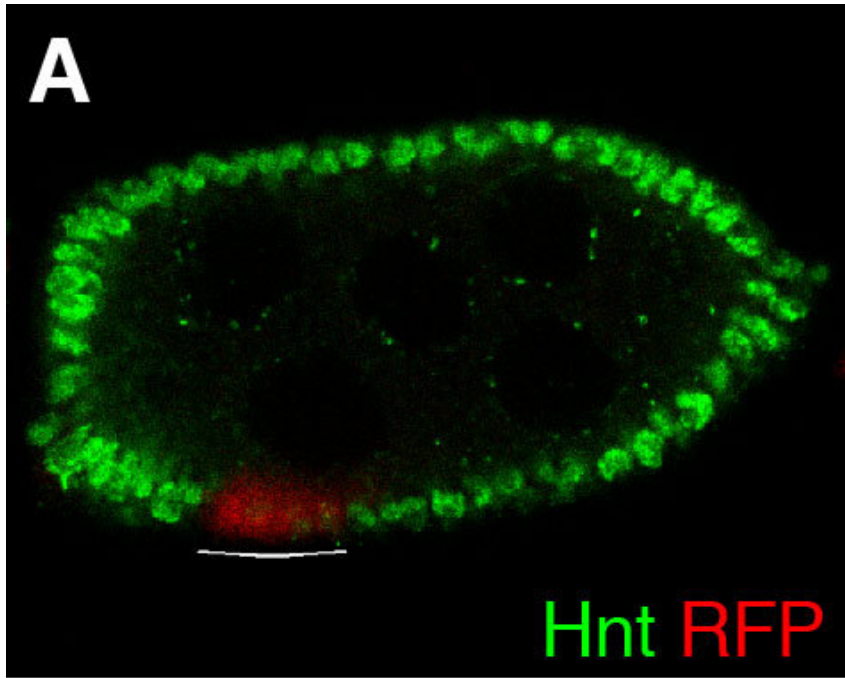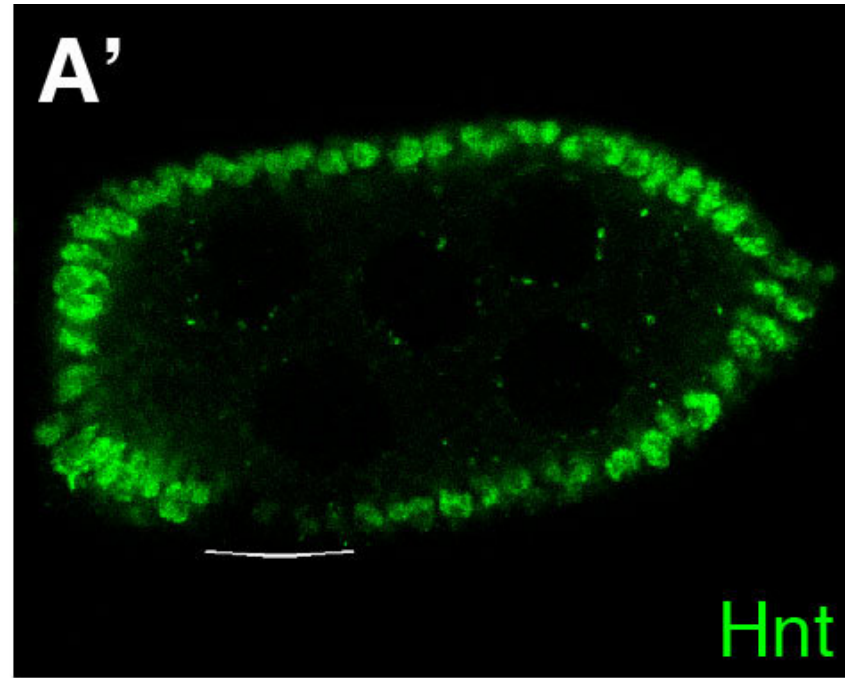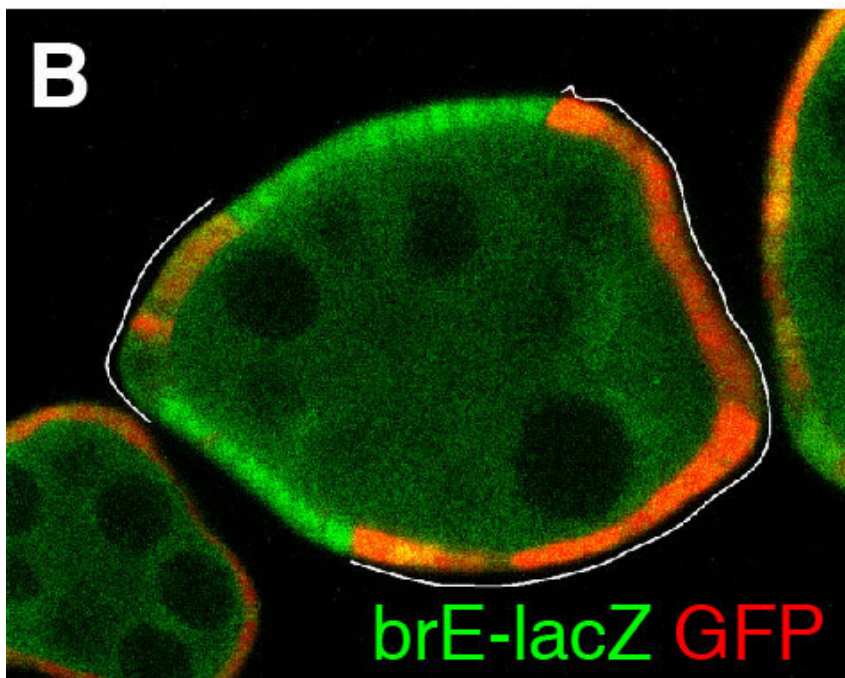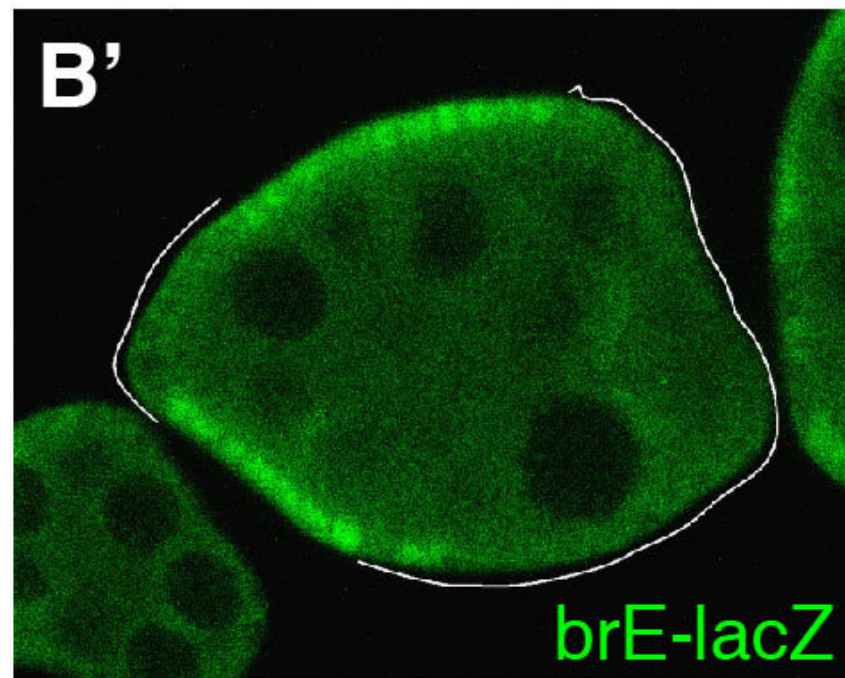

**Fig. S1**

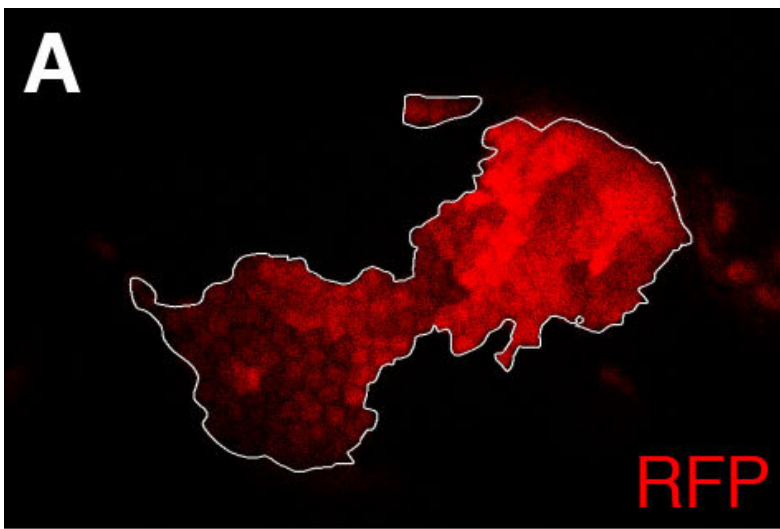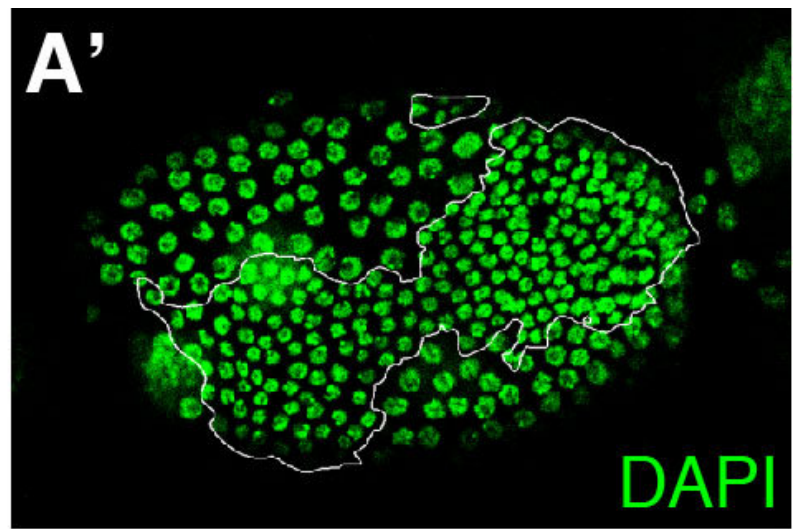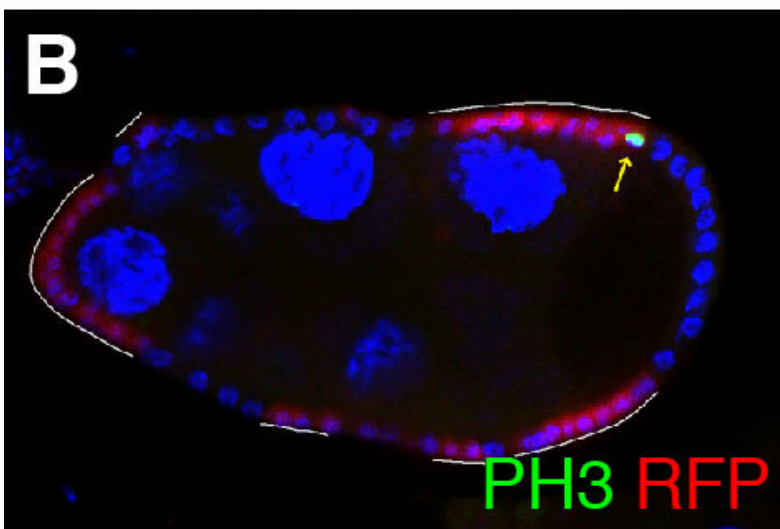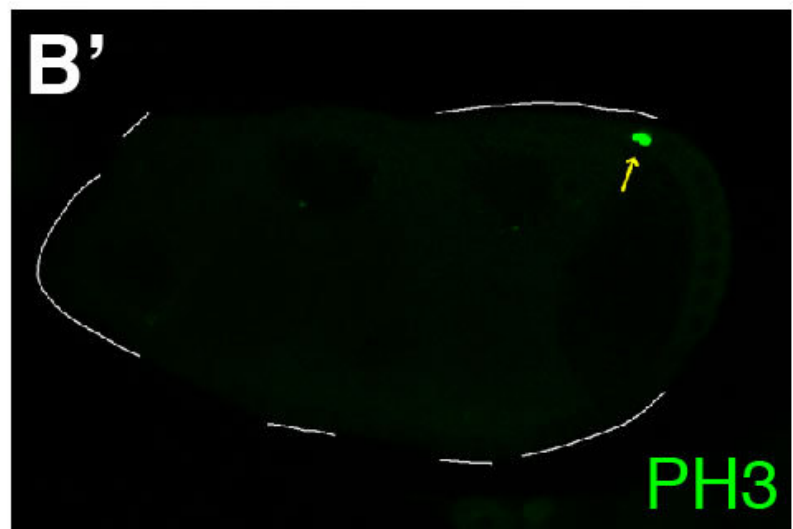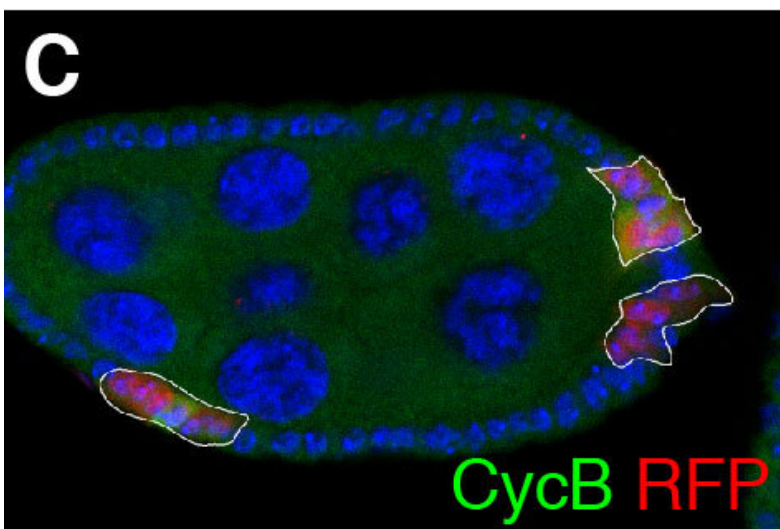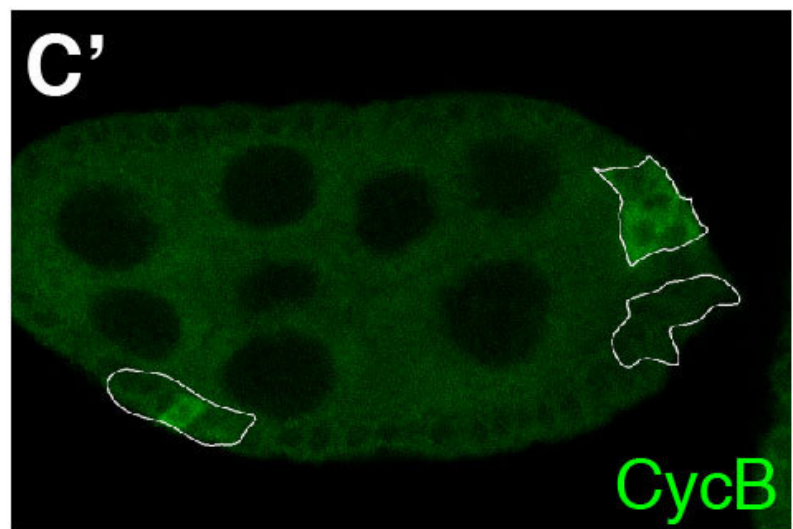

**Fig. S2**

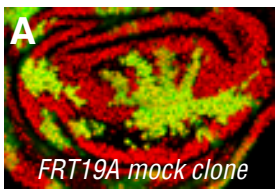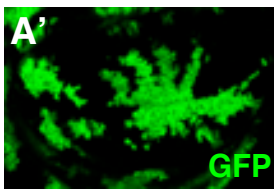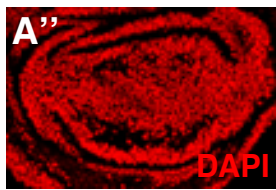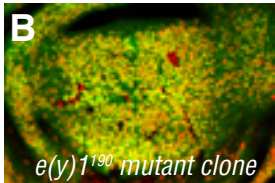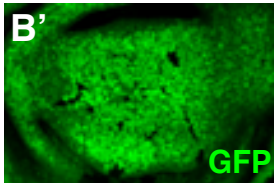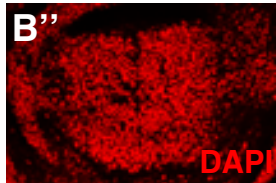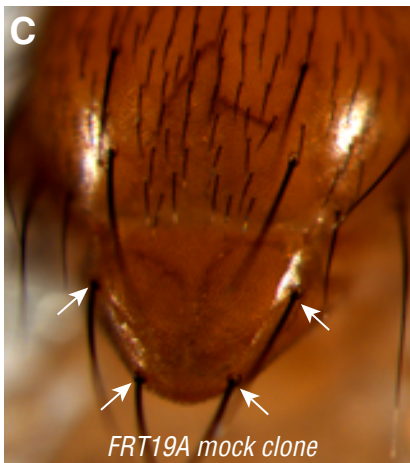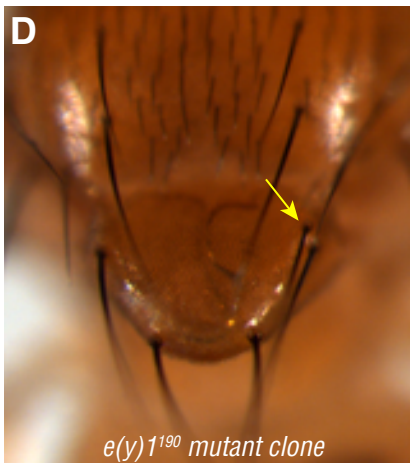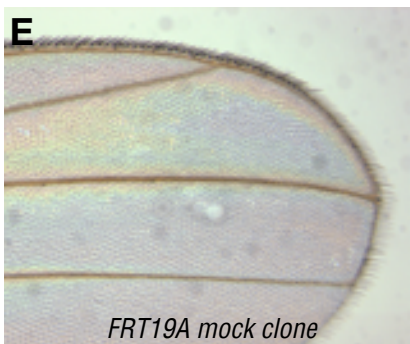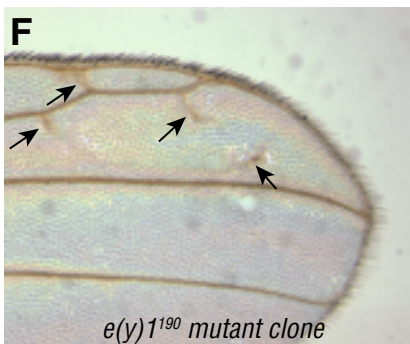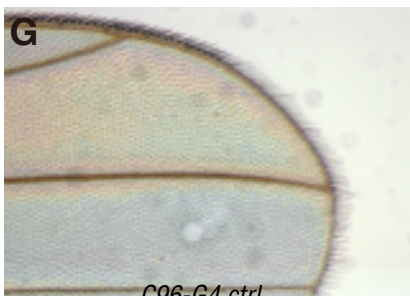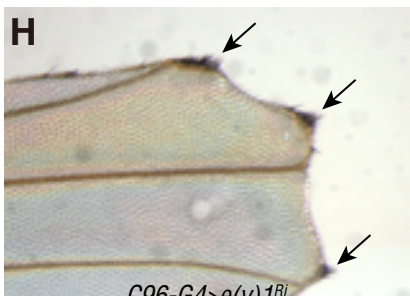

*en-G4, UAS-RFP/+; tub-G80ts/+*

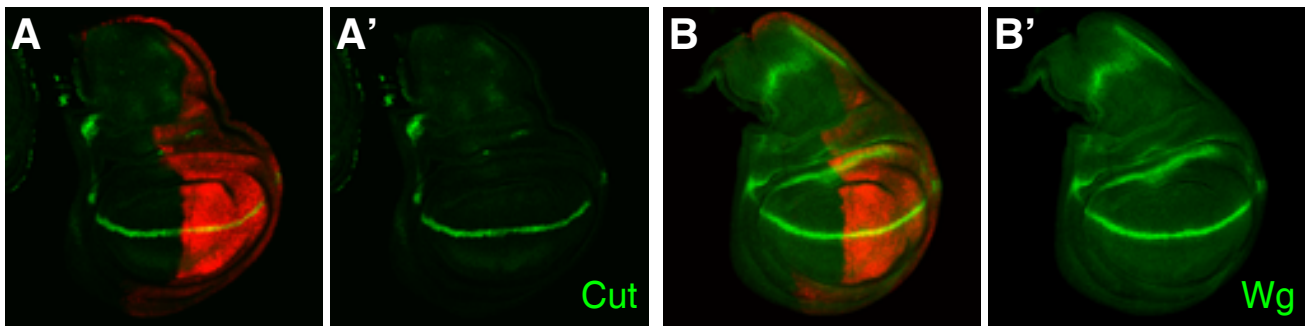

*en-G4, UAS-RFP/UAS-Su(H)-VP16; tub-G80ts/+*

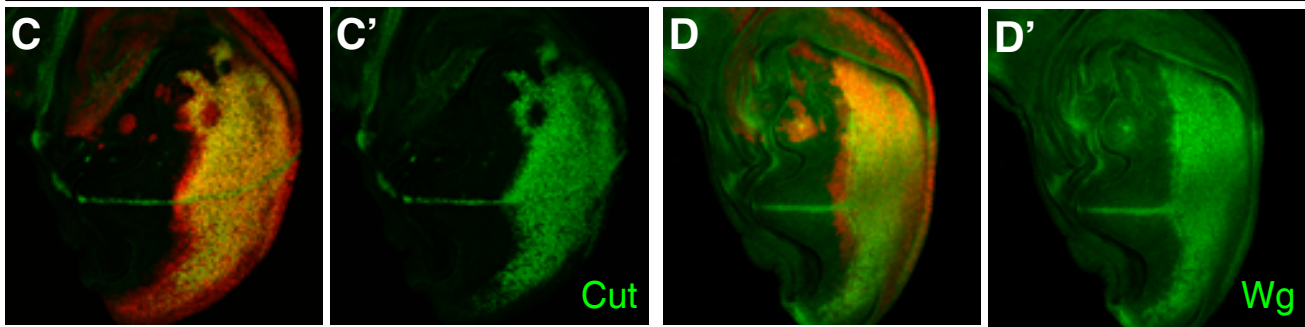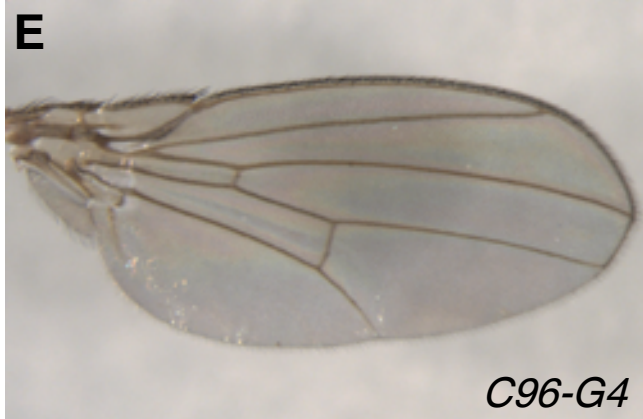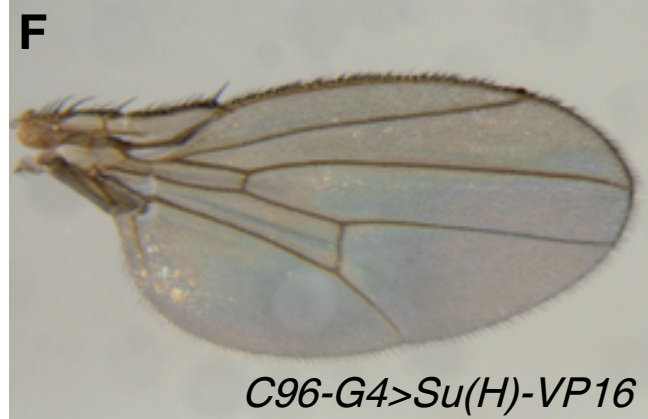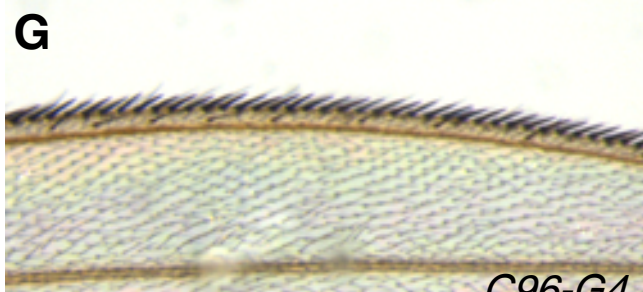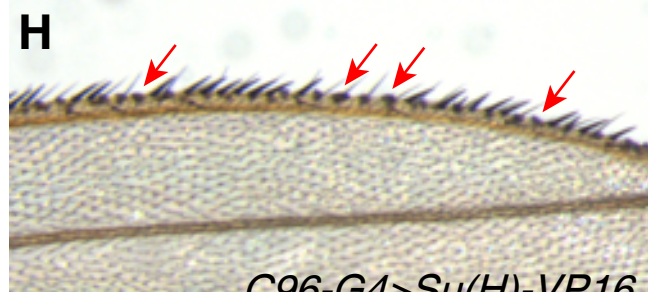

**Table S1: Genotypes related to figures**

| Figure name | Genotype                                                                                                                  |
|-------------|---------------------------------------------------------------------------------------------------------------------------|
| Fig. 1A-B'  | <i>hsFLP/+;; act&gt;CD2&gt;Gal4, UAS-RFP/UAS-e(y)I<sup>RNAi-BL32345</sup></i> (> = FRT in this and all following figures) |
| Fig. 1C,C'  | <i>hsFLP/+;E(spl)mβ-CD2/+; act&gt;y<sup>+</sup>&gt;Gal4, UAS-lacZ/UAS-e(y)I<sup>RNAi-BL32345</sup></i>                    |
| Fig. 1D,D'  | <i>hsFLP/+; act&gt;y<sup>+</sup>&gt;Gal4, UAS-GFP/+; E(spl)m7-lacZ/UAS-e(y)I<sup>RNAi-BL32345</sup></i>                   |
| Fig. 2B-C'' | <i>ubi-mRFPnls, w, hsFLP<sup>122</sup> FRT19A/w, hsFLP<sup>122</sup> e(y)I<sup>190</sup> FRT19A</i>                       |
| Fig. 2D     | <i>w, ubi-GFP,M(1)<sup>osp</sup> FRT19A/w, hsFLP<sup>122</sup> e(y)I<sup>190</sup> FRT19A;; +/TM6B</i>                    |
| Fig. 2E     | <i>w, ubi-GFP,M(1)<sup>osp</sup> FRT19A/w, hsFLP<sup>122</sup> e(y)I<sup>190</sup> FRT19A;; Dp(1;3)DC335/+</i>            |
| Fig. 3A     | <i>w<sup>J118</sup></i>                                                                                                   |
| Fig. 3B     | <i>C96-Gal4/UAS-e(y)I<sup>RNAi-BL32345</sup></i>                                                                          |
| Fig. 3C     | <i>N<sup>264-39</sup>/+</i>                                                                                               |
| Fig. 3D     | <i>N<sup>264-39</sup>/+;; C96-Gal4/UAS-e(y)I<sup>RNAi-BL32345</sup></i>                                                   |
| Fig. 3E     | <i>N<sup>264-39</sup>/P{GT1}e(y)I<sup>BG00948</sup></i>                                                                   |
| Fig. 3F     | <i>N<sup>264-39</sup>/e(y)I<sup>190</sup></i>                                                                             |
| Fig. 3G     | <i>N<sup>1</sup>/+</i>                                                                                                    |
| Fig. 3H     | <i>N<sup>1</sup>/e(y)I<sup>190</sup></i>                                                                                  |
| Fig. 3I,J   | <i>en-Gal4, UAS-GFP/+; tub-Gal80ts/+</i>                                                                                  |
| Fig. 3K,L   | <i>en-Gal4, UAS-GFP/+; tub-Gal80ts/UAS-e(y)I<sup>RNAi-BL32345</sup></i>                                                   |
| Fig. 4A,A'  | <i>hsFLP/+;; act&gt;CD2&gt;Gal4, UAS-RFP/UAS-e(y)I<sup>RNAi-BL32345</sup></i>                                             |
| Fig. 4B,B'  | <i>hsFLP/+; UAS-N<sup>EXT</sup>/+; act&gt;CD2&gt;Gal4, UAS-RFP/UAS-e(y)I<sup>RNAi-BL32345</sup></i>                       |
| Fig. 4C,C'  | <i>hsFLP/+; UAS-N<sup>CD</sup>/+; act&gt;CD2&gt;Gal4, UAS-RFP/UAS-e(y)I<sup>RNAi-BL32345</sup></i>                        |
| Fig. 4D,D'  | <i>hsFLP/+; UAS-Su(H)-VP16/+; act&gt;CD2&gt;Gal4, UAS-RFP/UAS-e(y)I<sup>RNAi-BL32345</sup></i>                            |
| Fig. 4E     | <i>C96-Gal4/+</i>                                                                                                         |
| Fig. 4F     | <i>C96-Gal4/UAS-e(y)I<sup>RNAi-BL32345</sup></i>                                                                          |
| Fig. 4G     | <i>UAS-N<sup>CD</sup>/+; C96-Gal4/UAS-e(y)I<sup>RNAi-BL32345</sup></i>                                                    |
| Fig. 4H     | <i>UAS-Su(H)-VP16/+; C96-Gal4/UAS-e(y)I<sup>RNAi-BL32345</sup></i>                                                        |
| Fig. 6A     | <i>en-Gal4, UAS-GFP/+; tub-Gal80ts/UAS-TAF12<sup>RNAi-BL34852</sup></i>                                                   |
| Fig. 6B     | <i>en-Gal4, UAS-GFP/+; tub-Gal80ts/UAS-TAF1<sup>RNAi-BL32421</sup></i>                                                    |
| Fig. 6C     | <i>en-Gal4, UAS-GFP/UAS-e(y)2<sup>RNAi-BL42524</sup>; tub-Gal80ts/+</i>                                                   |
| Fig. 6D     | <i>C96-Gal4/UAS-TAF12<sup>RNAi-BL34852</sup></i>                                                                          |
| Fig. 6E     | <i>C96-Gal4/UAS- UAS-TAF1<sup>RNAi-BL32421</sup></i>                                                                      |
| Fig. 6F     | <i>UAS-e(y)2<sup>RNAi-BL42524</sup>/+; C96-Gal4/+</i>                                                                     |
| Fig. S1A,A' | <i>hsFLP/+; UAS-e(y)I<sup>NIG-6474R-1</sup>/+; act&gt;CD2&gt;Gal4, UAS-RFP/UAS-dcr2</i>                                   |

|               |                                                                                                     |
|---------------|-----------------------------------------------------------------------------------------------------|
| Fig. S1B,B'   | <i>hsFLP/+; act&gt;y<sup>+</sup>&gt;Gal4, UAS-GFP/+; br-lacZ/UAS-e(y)I<sup>RNAi-BL32345</sup></i>   |
| Fig. S2A-C'   | <i>hsFLP/+;; act&gt;CD2&gt;Gal4, UAS-RFP/UAS-e(y)I<sup>RNAi-BL32345</sup></i>                       |
| Fig. S3A-A''  | <i>w, ubi-GFP,M(1)<sup>osp</sup> FRT19A/w, hsFLP<sup>122</sup> FRT19A</i>                           |
| Fig. S3 B-B'' | <i>w, ubi-GFP,M(1)<sup>osp</sup> FRT19A/w, hsFLP<sup>122</sup> e(y)I<sup>190</sup> FRT19A</i>       |
| Fig. S3C      | <i>ubi-mRFPnls, w, hsFLP<sup>122</sup> FRT19A/w, hsFLP<sup>122</sup> FRT19A</i>                     |
| Fig. S3D      | <i>ubi-mRFPnls, w, hsFLP<sup>122</sup> FRT19A/w, hsFLP<sup>122</sup> e(y)I<sup>190</sup> FRT19A</i> |
| Fig. S3E      | <i>w, ubi-GFP,M(1)<sup>osp</sup> FRT19A/w, hsFLP<sup>122</sup> FRT19A</i>                           |
| Fig. S3F      | <i>w, ubi-GFP,M(1)<sup>osp</sup> FRT19A/w, hsFLP<sup>122</sup> e(y)I<sup>190</sup> FRT19A</i>       |
| Fig. S3G      | <i>C96-Gal4/+</i>                                                                                   |
| Fig. S3H      | <i>C96-Gal4/UAS-e(y)I<sup>RNAi-BL32345</sup></i>                                                    |
| Fig. S4A-B'   | <i>en-Gal4, UAS-RFP/+; tub-Gal80ts/+</i>                                                            |
| Fig. S4C-D'   | <i>en-Gal4, UAS-RFP/UAS-Su(H)-VP16; tub-Gal80ts/+</i>                                               |
| Fig. S4E,G    | <i>C96-Gal4/+</i>                                                                                   |
| Fig. S4F,H    | <i>UAS-Su(H)-VP16/+; C96-Gal4/+</i>                                                                 |
